# Supplementary material for: The slow magnetic relaxation observed in a mixed carboxylate/hydroxide-bridged compound [Co2Na(4-cpa)2(μ3-OH)(H2O)]∞featuring magnetic Δ-chains
Source: Royal Society of Chemistry journal article supplement (doi:10.1039/b606765d), 2006-01-01
Supplement: b606765d.pdf [file b606765d.pdf]

## ELECTRONIC SUPPLEMENTARY DATA

for

**The slow magnetic relaxation observed in a mixed carboxylate/  
hydroxide-bridged compound  $[\text{Co}_2\text{Na}(\text{4-cpa})_2(\mu_3\text{-OH})(\text{H}_2\text{O})]_\infty$   
featuring magnetic  $\Delta$ -chains**

Xiao-Ning Cheng, Wei-Xiong Zhang, Yan-Zhen Zheng, and Xiao-Ming Chen\*

School of Chemistry and Chemical Engineering, Sun Yat-Sen University, Guangzhou  
510275, China

Fax: Int. code +86 20 8411-2245, E-mail: cxm@mail.sysu.edu.cn

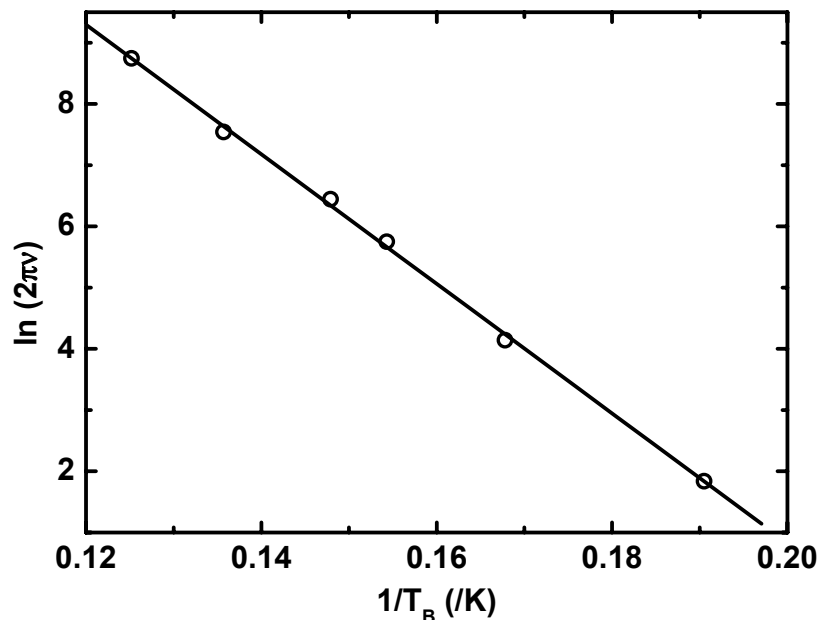

**Fig. S1.**  $1/T_B$  versus  $\ln(2\pi\nu)$  plot. The solid line represents the least-squares fit of the experimental data to the Arrhenius equation (see text).

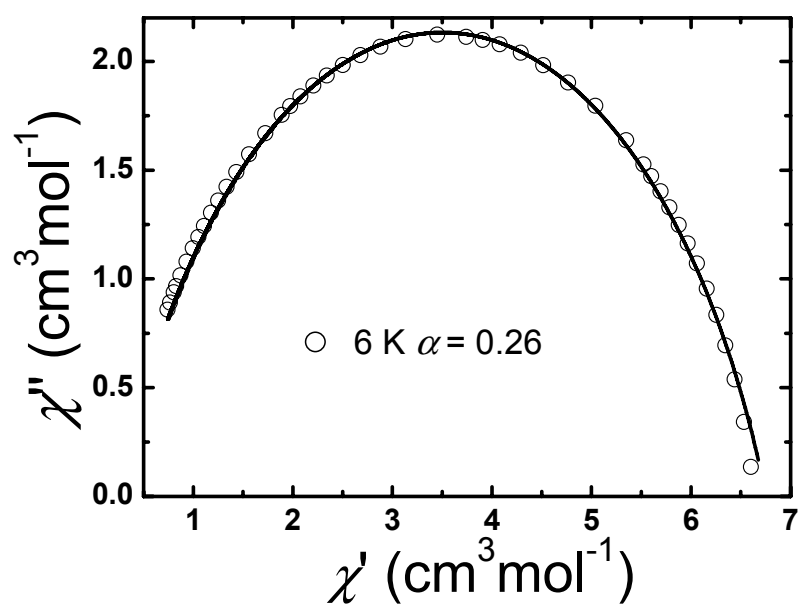

**Fig. S2.** Cole-Cole diagram at 6 K. The solid line represents the least-squares fit obtained with a Debye model (see text).

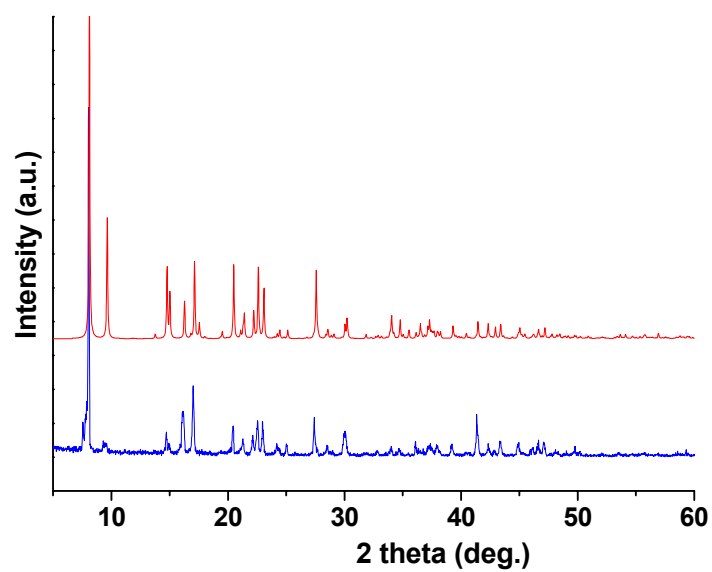

**Fig. S3.** The simulated (red) and experimental (blue) powder X-ray diffraction patterns of **1**.
